# Supplementary material for: Anisotropic mechanoresponse of energetic crystallites: a quantum molecular dynamics study of nano-collision
Source: Royal Society of Chemistry journal article supplement (doi:10.1039/c5nr08769d), 2016-01-01
Supplement: c5nr08769d1.pdf [file c5nr08769d1.pdf]

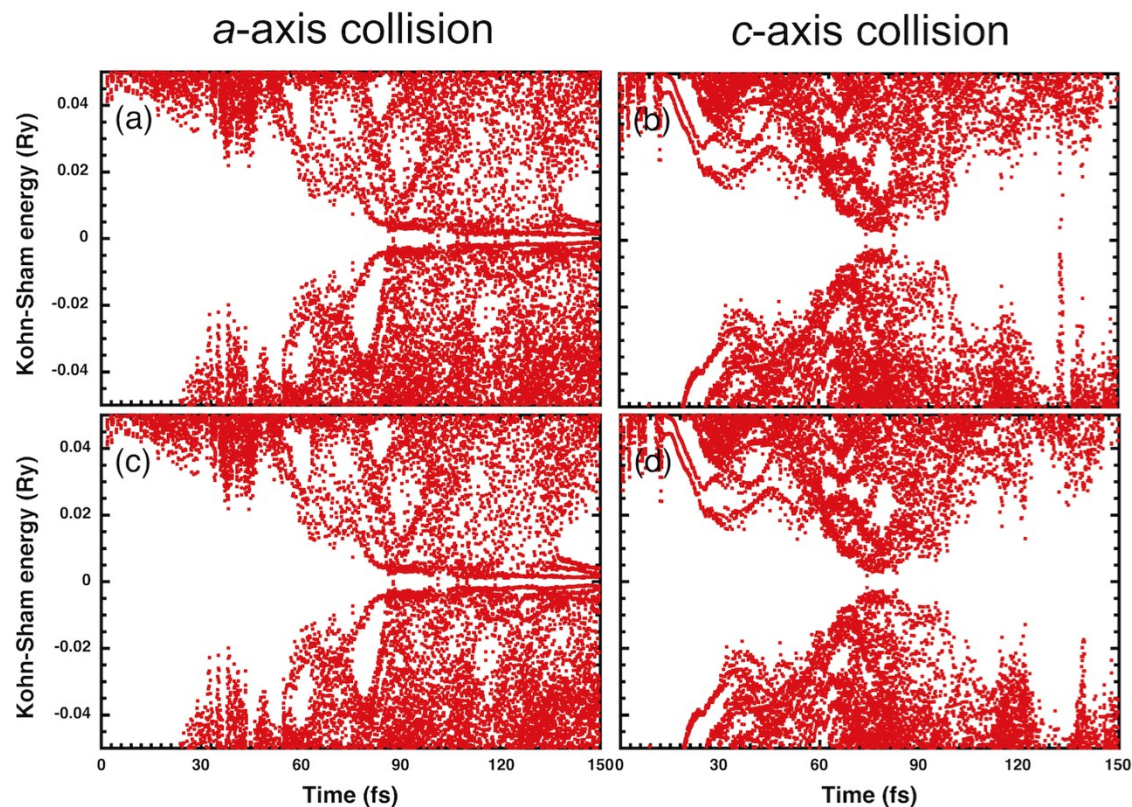

Fig. S1. Kohn-Sham eigenenergies as a function of time (a) and (c) for the 6 km/s *a*-axis collision of two additional trajectories, (b) and (d) for the 6 km/s *c*-axis collision of another two additional trajectories.

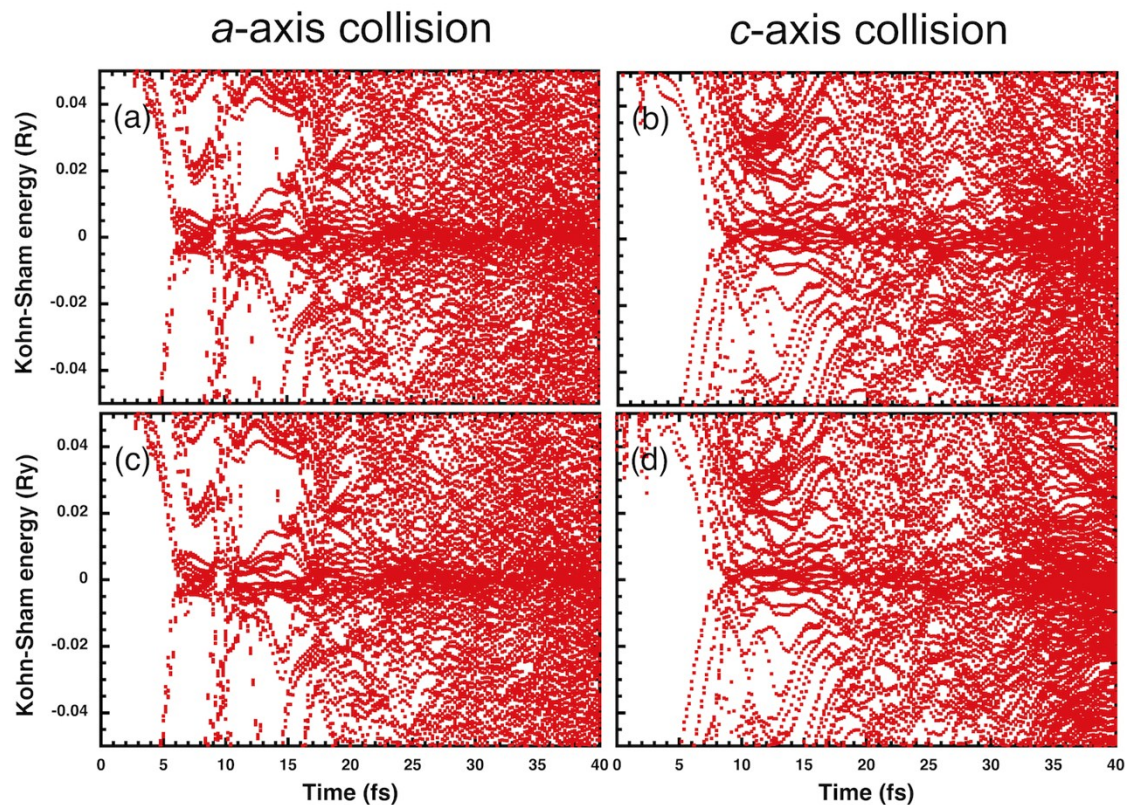

Fig. S2. Kohn-Sham eigenenergies as a function of time (a) and (c) for the 20 km/s *a*-axis collision of two additional trajectories, (b) and (d) for the 20 km/s *c*-axis collision of another two additional trajectories.
